# Supplementary material
Source: Springer Nature journal article supplement (https://www.springermedizin.de/resource/supplementary/12958_2014_1309_MOESM1_ESM.pdf/9567000)

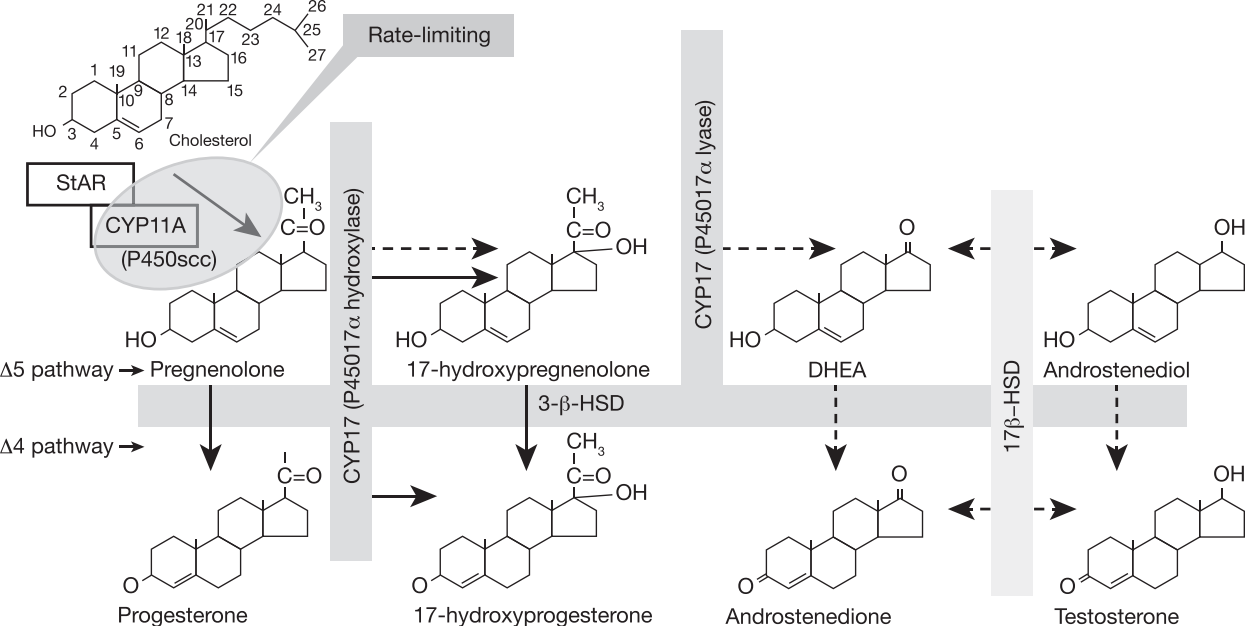

StAR = steroidogenic acute regulatory protein

3 $\beta$ -HSD = 3 $\beta$ -hydroxysteroid dehydrogenase

Supplement: MOESM1 [file 9567000]
